# Supplementary material
Source: publisher site journal article supplement (https://www.dovepress.com/article/288296)
Supplement: Supplementary file 1 [file get_supplementary_file.php]

**Supplemental material for:**

**Evaluating outcomes associated with disease-modifying treatments
for multiple sclerosis in DMT-naïve patients**

**Corresponding author:** Leorah Freeman, MD, PhD [[leorah.freeman@austin.utexas.edu](mailto:leorah.freeman@austin.utexas.edu)]

**Figure S1. Index medication.**

**
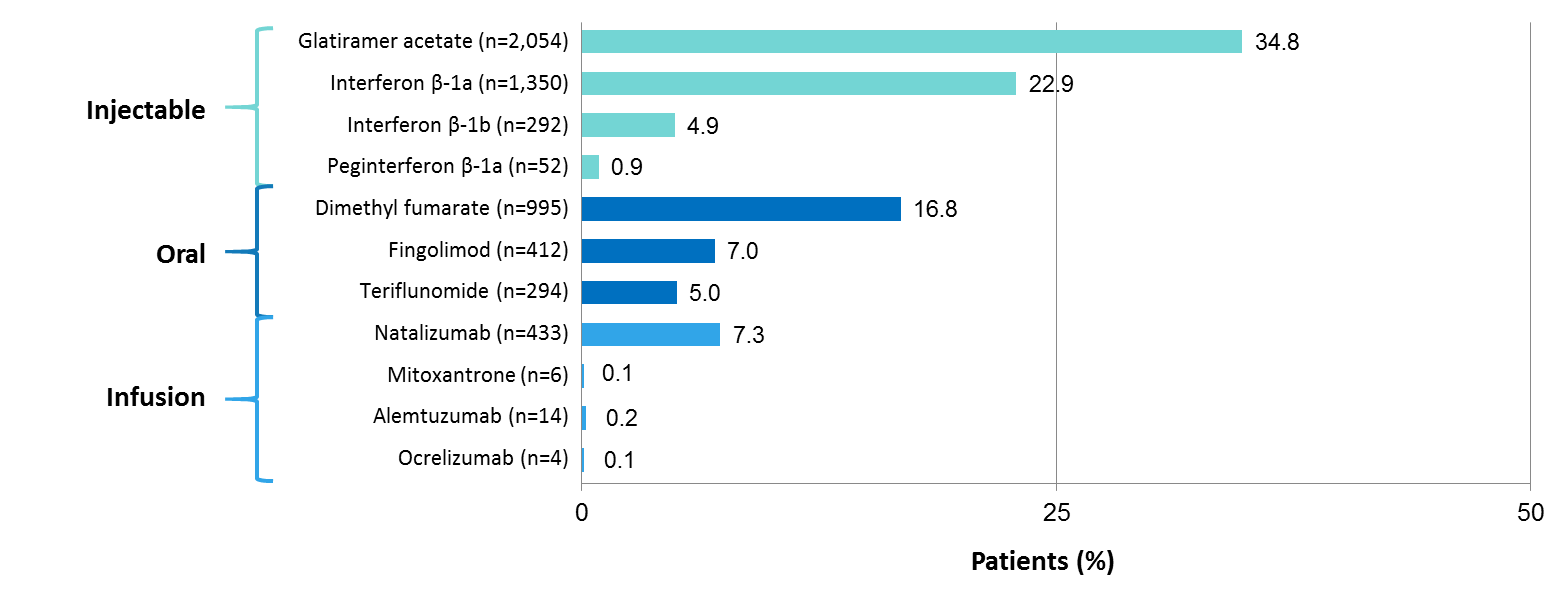
**

**Figure S2. Patient adherence (A) and patient persistence (B) on DMT.**

**
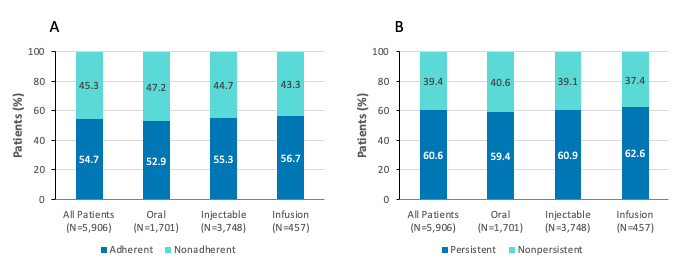
**

DMT, disease-modifying therapy.

**Figure S3. Proportion of patients experiencing relapses in the pre-index and post-index periods.**

**
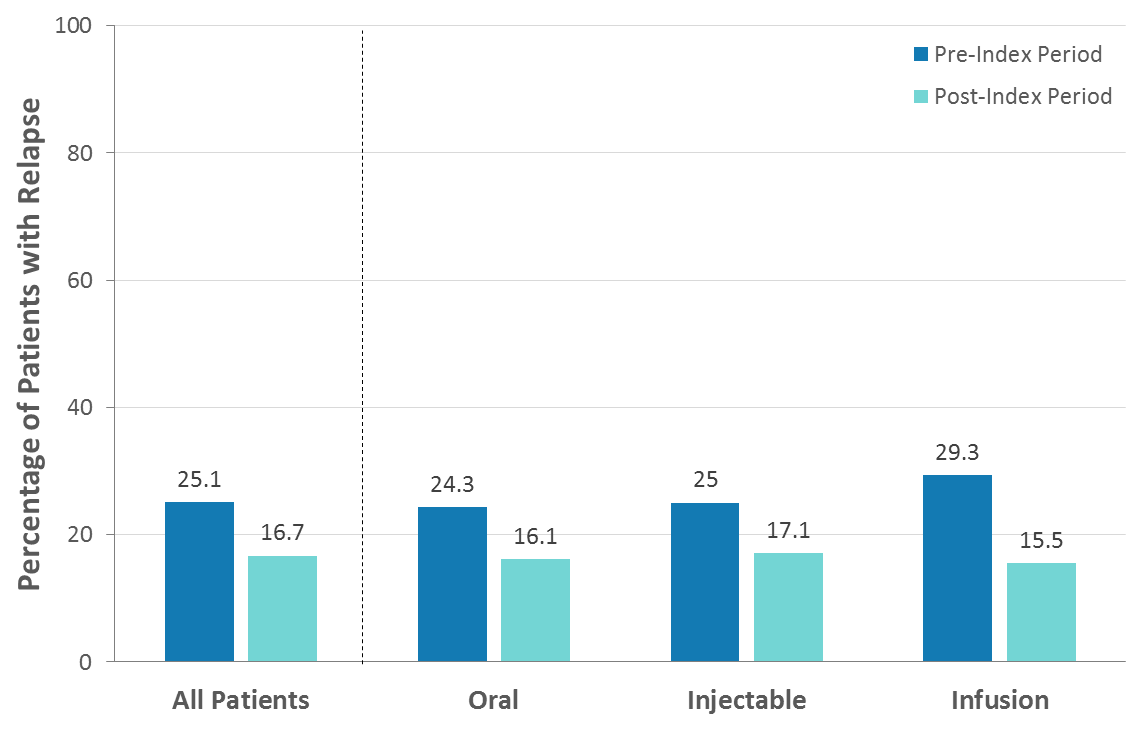
**

**Figure S4. All-cause and MS-related costs in the post-index period.**

**
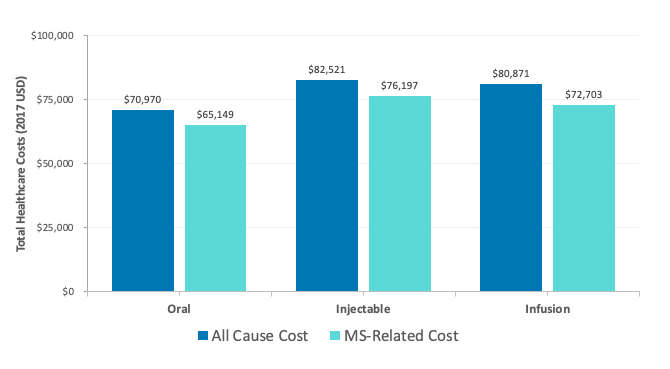
**

MS, multiple sclerosis.
